# Supplementary material for: Opposing Immune-Metabolic Signature in Visceral Versus Subcutaneous Adipose Tissue in Patients with Adenocarcinoma of the Oesophagus and the Oesophagogastric Junction
Source: MDPI journal article supplement (doi:10.3390/metabo11110768), 2021-11-10
Supplement: s1 [file s1]

**Supplementary table S1.** Changes in body composition from time of diagnosis to surgery

|                                               | <b>Diagnosis</b> | <b>At surgery</b> | <b><i>p</i> value</b> |
|-----------------------------------------------|------------------|-------------------|-----------------------|
| <b>Total body fat mass (kg)</b>               | 23.03 ± 4.9      | 24.44 ± 7.75      | >0.99                 |
| <b>Total body fat free mass (kg)</b>          | 52.27 ± 10.9     | 49.11 ± 10.54     | 0.0078                |
| <b>Visceral fat area (cm<sup>2</sup>)</b>     | 157.1 ± 123.5    | 148.7 ± 119.3     | 0.21                  |
| <b>Subcutaneous fat area (cm<sup>2</sup>)</b> | 163.5 ± 71.99    | 167.5 ± 100.7     | >0.99                 |
| <b>Skeletal muscle (cm<sup>2</sup>)</b>       | 154 ± 36.34      | 143.5 ± 35.15     | 0.0078                |
| <b>Intermuscular fat (cm<sup>2</sup>)</b>     | 11.69 ± 7.22     | 9.24 ± 3.67       | 0.68                  |

Statistics performed on n=8 patients that received neoadjuvant treatment. Intermuscular fat (cm<sup>2</sup>) only available for 7 patients.

**Supplementary table S2. Patient Characteristics**

| <b>n=12</b>                                       |                                      | <b>Percent (%)</b>       |       |
|---------------------------------------------------|--------------------------------------|--------------------------|-------|
| <b>Age</b>                                        | Mean $\pm$ SD<br>Range               | 65.6 $\pm$ 11.8<br>46-83 |       |
| <b>Gender</b>                                     | Male (n)                             | 9                        | 75    |
|                                                   | Female (n)                           | 3                        | 25    |
| <b>Obesity status (pre-treatment)<sup>a</sup></b> | Non-obese                            | 7                        | 58.33 |
|                                                   | Obese (n)                            | 5                        | 41.67 |
| <b>Cancer</b>                                     | Oesophageal adenocarcinoma (OAC) (n) | 6                        | 50    |
|                                                   | Oesophageal gastric junction (n)     | 6                        | 50    |
| <b>T stage</b>                                    | T0 (n)                               | 1                        | 8.33  |
|                                                   | T1 (n)                               | 1                        | 8.33  |
|                                                   | T1a (n)                              | 1                        | 8.33  |
|                                                   | T1b (n)                              | 2                        | 16.67 |
|                                                   | T2 (n)                               | 1                        | 8.33  |
|                                                   | T3 (n)                               | 5                        | 41.67 |
|                                                   | T4b (n)                              | 1                        | 8.33  |
| <b>N stage</b>                                    | N0 (n)                               | 6                        | 50    |
|                                                   | N1 (n)                               | 5                        | 41.67 |
|                                                   | N2 (n)                               | 1                        | 8.33  |
| <b>M stage</b>                                    | Mx (n)                               | 12                       | 100   |
| <b>Stage of differentiation<sup>b</sup></b>       | Moderate (n)                         | 4                        | 33.33 |
|                                                   | Moderate to poor (n)                 | 1                        | 8.33  |
|                                                   | Poor (n)                             | 6                        | 50    |
| <b>Treatment received</b>                         | Surgery only (n)                     | 4                        | 33.33 |
|                                                   | FLOT + Surgery (n)                   | 3                        | 25    |
|                                                   | FOLFOX + Surgery (n)                 | 1                        | 8.33  |
|                                                   | CROSS + Surgery (n)                  | 4                        | 33.33 |
| <b>TRG<sup>c</sup></b>                            | 1 (n)                                | 1                        | 12.5  |
|                                                   | 2 (n)                                | 1                        | 12.5  |
|                                                   | 3 (n)                                | 4                        | 50    |
|                                                   | 4 (n)                                | 2                        | 25    |

<sup>a</sup> Obesity status determined at diagnosis by CT defined as visceral fat area >80.1 cm<sup>2</sup> for females and 163.8 cm<sup>2</sup> for males

<sup>b</sup> Stage of differentiation unavailable for one patient

<sup>c</sup> TRG available for 8 patients. Expressed as a % of patients with a TRG
