# Supplementary material for: Opposing Immune-Metabolic Signature in Visceral Versus Subcutaneous Adipose Tissue in Patients with Adenocarcinoma of the Oesophagus and the Oesophagogastric Junction
Source: MDPI journal article supplement (doi:10.3390/metabo11110768), 2021-11-10
Supplement: s1 [file s1]

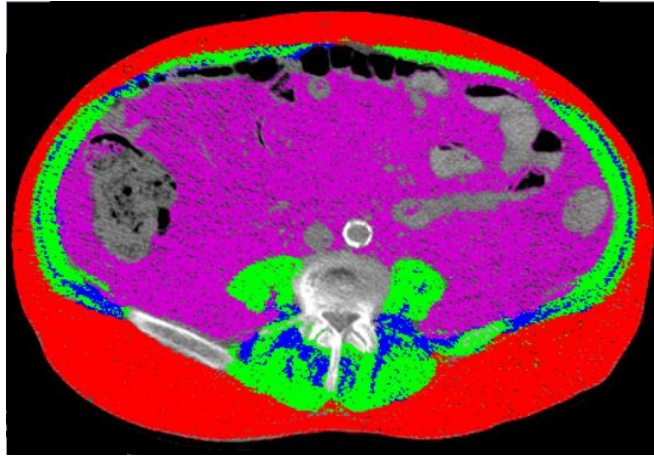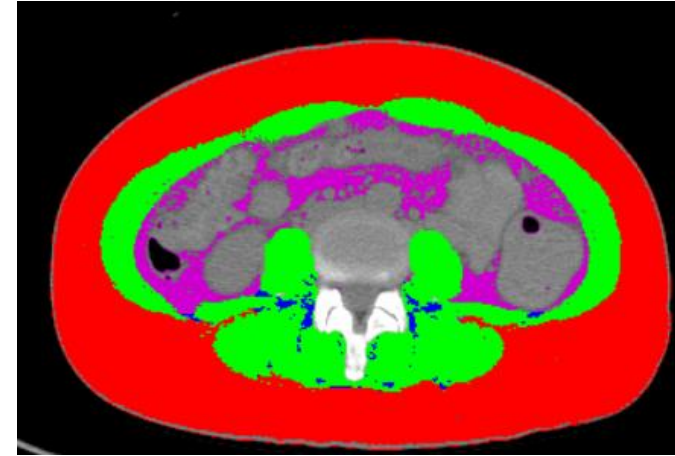

***Supplementary figure S1. Computed tomography assessment of body composition***

Abdominal CT images at L3 indicating subcutaneous adipose tissue in red, skeletal muscle in green, intermuscular fat in blue and visceral adipose tissue in pink. **(A)** Abdominal CT image at L3 from a visceraally obese sarcopenic patient. **(B)** Abdominal CT image at L3 from a non-viscerally obese non-sarcopenic patient.
